# Supplementary material for: A Signaling Lipid Associated with Alzheimer’s Disease Promotes Mitochondrial Dysfunction
Source: PubMed Central journal article supplement (PMC4725818; doi:10.1038/srep19332), 2016-01-13
Supplement: srep19332-s1.pdf [file srep19332-s1.pdf]

## **Supplemental Information**

### **A Signaling Lipid Associated with Alzheimer's Disease Promotes Mitochondrial Dysfunction**

Michael A. Kennedy<sup>1</sup>, Tia C. Moffat<sup>1</sup>, Kenneth Gable<sup>2</sup>, Suriakarthiga Ganesan<sup>3</sup>, Karolina Niewola-Staszewska<sup>4</sup>, Anne Johnston<sup>5</sup>, Corey Nislow<sup>6</sup>, Guri Giaever<sup>6</sup>, Linda J. Harris<sup>5</sup>, Robbie Loewith<sup>4</sup>, Vanina Zarembek<sup>3</sup>, Mary-Ellen Harper<sup>1</sup>, Teresa Dunn<sup>2</sup>, Steffany A.L. Bennett<sup>1,\*</sup> and Kristin Baetz<sup>1,\*</sup>

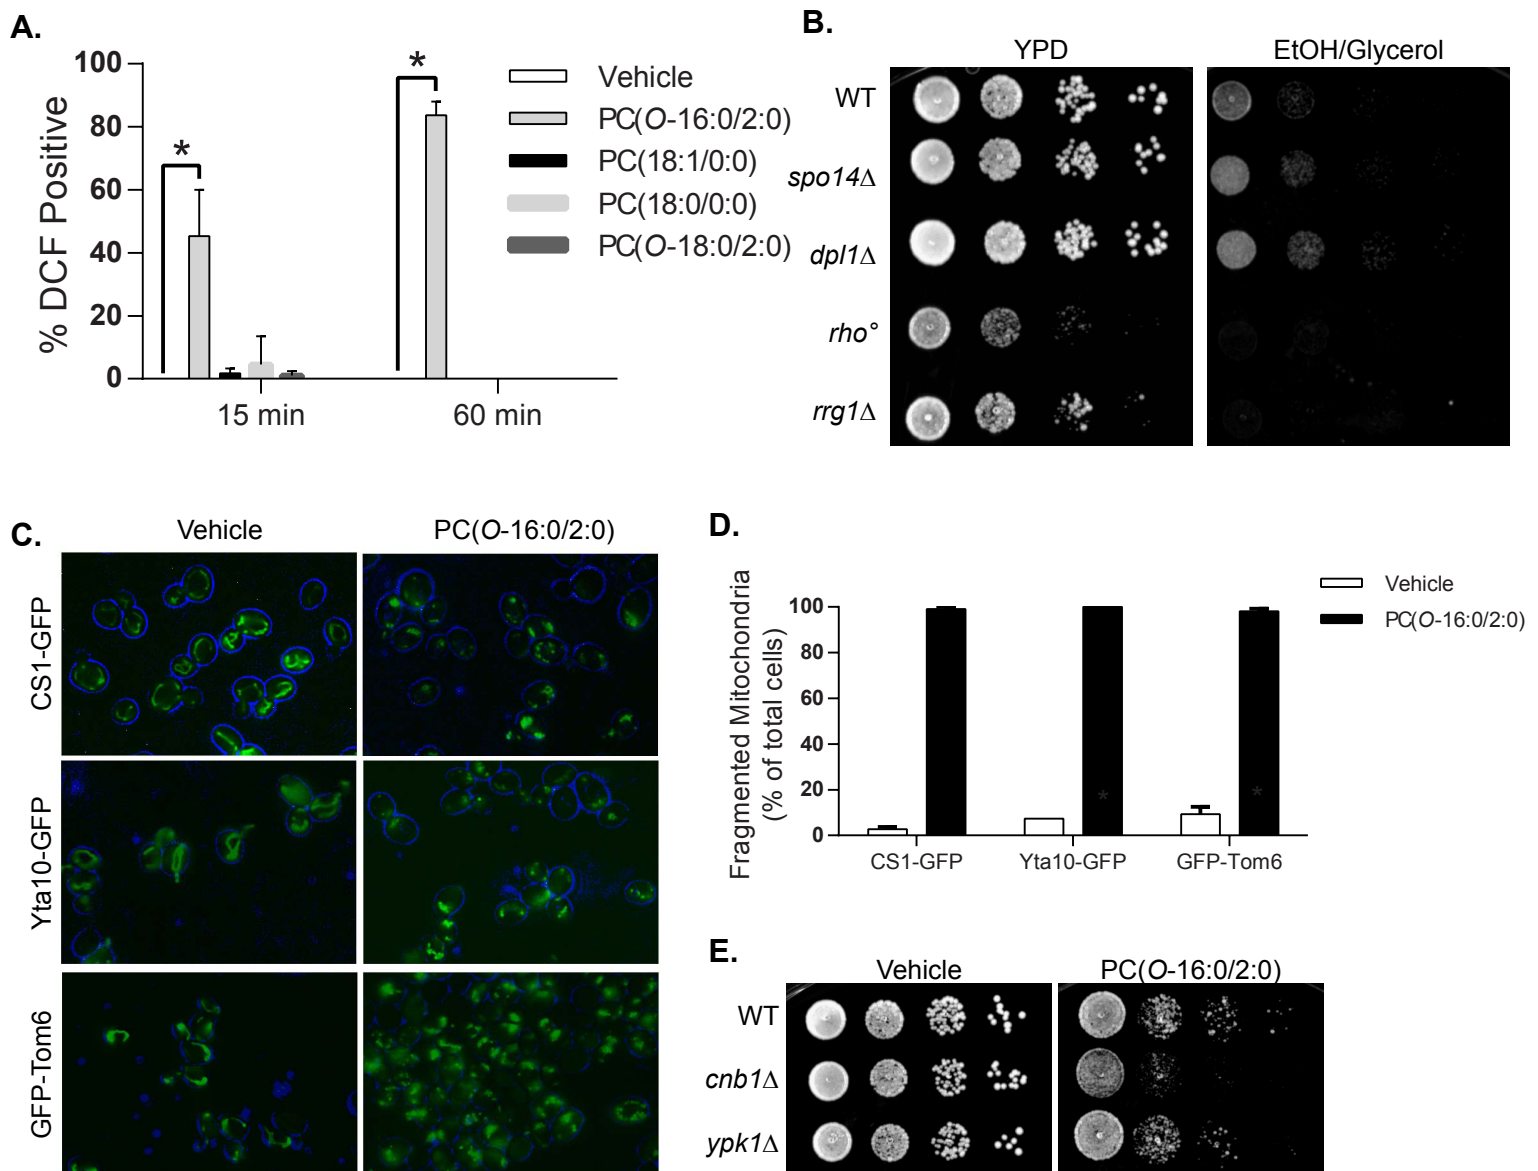

**Supplemental Figure 1. (A) H<sub>2</sub>-DCFDA fluorescence is not increased in cells treated with control lipids.** Wild type (BY4741) cells were grown to mid log in YPD and subsequently treated with Vehicle (0.2% Ethanol) or 20  $\mu$ M of the indicated lipids for  $t = 15$  or 60 min prior to labelling with H<sub>2</sub>-DCFDA (10  $\mu$ M). Quantifications of H<sub>2</sub>-DCFDA positive cells at the indicated time points from at least three independent experiments where a minimum of 150 cells were counted. ND - not detected. Error bars = SD, (\* $p < 0.01$ , Kruskal-Wallis, corrected for multiple comparisons). **(B) Growth of mitochondrial deficient yeast strains on non-fermentable carbon source.** Wild type (WT, BY4741), *spo14* $\Delta$  (YKB3113), *dpl1* $\Delta$  (YKB3306), *rho*<sup>o</sup> (YKB3925), *rrg1* $\Delta$  (YKB3911) strains were tested for the ability to grow on a non-fermentable carbon source (3% v/v ethanol and 3% v/v glycerol). The indicated strains were spotted in 10-fold dilutions and incubated for 2 days at 30°C. **(C) and (D) PC(O-16:0/2:0) promotes mitochondrial fragmentation.** Wild type (WT, BY4741) cells expressing the indicated mitochondrial markers fused to GFP were incubated with Vehicle or 20  $\mu$ M PC(O-16:0/2:0) for 1 hour at 30°C and then imaged live using fluorescence microscopy (see Material and Methods). CS1-GFP (matrix), Yta1-GFP (inner membrane), GFP-Tom6 (outer membrane). Mitochondrial fragmentation for each marker was quantified as the percentage of cells displaying a fragmented pattern in the presence of vehicle or PC(O-16:0/2:0).  $n = 4$ , Error bars = SD. **A *ypk1* $\Delta$  mutant does not have increased sensitivity to PC(O-16:0/2:0).** Wild type (WT, BY4741), *cnb1* $\Delta$  (YKB4240) and *ypk1* $\Delta$  (YKB4241) strains were spotted in 10-fold dilutions and incubated for 2 days at 30°C on YPD plates containing vehicle (0.2% EtOH) or PC(O-16:0/2:0) (6  $\mu$ g/ml).

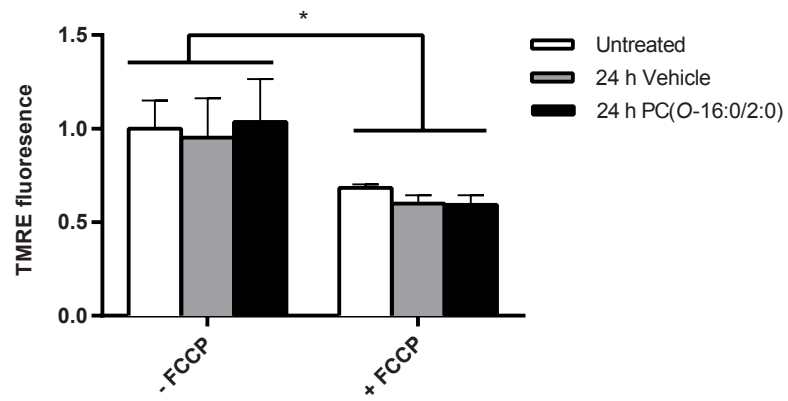

**Supplemental Figure 2.** *PC(O-16:2/2:0)* does not alter  $\Delta\Psi_m$  in cultured neurons. hNT neurons were left untreated or treated with vehicle or *PC(O-16:0/2:0)* (1  $\mu\text{M}$ ) in serum-free media for 24 hr. Changes in TMRE fluorescence represent changes in intensity averaged over 10 minutes and normalized to  $\mu\text{g}$  of protein relative to controls. FCCP was used as a positive control to induce proton leak and decrease mitochondrial membrane potential.

**Supplementary Table 1. List of yeast strains and plasmids used.**

| Name    | Genotype                                                                                                                                                                                                                 | Source     |
|---------|--------------------------------------------------------------------------------------------------------------------------------------------------------------------------------------------------------------------------|------------|
| YPH500  | <b>MAT<math>\alpha</math></b> <i>ade2-101 his3-<math>\Delta</math>200 leu2-<math>\Delta</math>1 lys2-801</i><br><i>trp1-<math>\Delta</math>63 ura3-52</i>                                                                | (1)        |
| BY4741  | <b>MATa</b> <i>his3<math>\Delta</math>1 leu2<math>\Delta</math>0 lys2<math>\Delta</math>0 met15<math>\Delta</math>0</i><br><i>ura3<math>\Delta</math>0</i>                                                               | (2)        |
| YKB3911 | <b>MATa</b> <i>his3<math>\Delta</math>1 leu2<math>\Delta</math>0 lys2<math>\Delta</math>0 met15<math>\Delta</math>0</i><br><i>ura3<math>\Delta</math>0 rrg1<math>\Delta</math>::KANMX</i>                                | This Study |
| YKB3925 | <b>MATa</b> <i>his3<math>\Delta</math>1 leu2<math>\Delta</math>0 lys2<math>\Delta</math>0 met15<math>\Delta</math>0</i><br><i>ura3<math>\Delta</math>0 rho<sup>o</sup></i>                                               | This Study |
| YKB3271 | <b>MATa</b> <i>his3<math>\Delta</math>1 leu2<math>\Delta</math>0 lys2<math>\Delta</math>0 met15<math>\Delta</math>0</i><br><i>ura3<math>\Delta</math>0 ypc1<math>\Delta</math>::KANMX ydc1<math>\Delta</math>::KANMX</i> | This Study |
| YKB3273 | <b>MATa</b> <i>his3<math>\Delta</math>1 leu2<math>\Delta</math>0 lys2<math>\Delta</math>0 met15<math>\Delta</math>0</i><br><i>ura3<math>\Delta</math>0 lcb4<math>\Delta</math>::KANMX lcb5<math>\Delta</math>::KANMX</i> | This Study |
| YKB3305 | <b>MATa</b> <i>his3<math>\Delta</math>1 leu2<math>\Delta</math>0 lys2<math>\Delta</math>0 met15<math>\Delta</math>0</i><br><i>ura3<math>\Delta</math>0 ysr3<math>\Delta</math>::KANMX lcb3<math>\Delta</math>::KANMX</i> | This Study |
| YKB3306 | <b>MATa</b> <i>his3<math>\Delta</math>1 leu2<math>\Delta</math>0 lys2<math>\Delta</math>0 met15<math>\Delta</math>0</i><br><i>ura3<math>\Delta</math>0 dpl1<math>\Delta</math>::KANMX</i>                                | This Study |

|             |                                                                                                                   |            |
|-------------|-------------------------------------------------------------------------------------------------------------------|------------|
| YKB3927     | <b>MATa</b> <i>his3Δ1 leu2Δ0 lys2Δ0 met15Δ0</i><br><i>ura3Δ0 dpl1Δ::NATMX lcb4Δ::KANMX</i><br><i>lcb5Δ::KANMX</i> | This Study |
| CS1-bGFP    | pGAL68 plasmid (CEN URA3) for expression of CS1 fused to GFP under the control of a GAL1/10 promoter              | (3)        |
| Yta10p-bGFP | pGAL68 plasmid (CEN URA3) for expression of Yta10 fused to GFP under the control of a GAL1/10 promoter            | (3)        |
| bGFP-Tom6p  | pGAL68 plasmid (CEN URA3) for expression of Tom6 fused to GFP under the control of a GAL1/10 promoter             | (3)        |

## References

1. R. S. Sikorski, P. Hieter, A System of Shuttle Vectors and Yeast Host Strains Designed for Efficient Manipulation of DNA in. *Genetics* (1989).
2. C. B. Brachmann, A. Davies, G. J. Cost, E. Caputo, Designer Deletion Strains derived from *Saccharomyces cerevisiae* S288C : a Useful set of Strains and Plasmids for PCR-mediated Gene Disruption and Other Applications. **132**, 115–132 (1998).
3. K. Okamoto, P. S. Perlman, R. A. Butow, The Sorting of Mitochondrial DNA and Mitochondrial Proteins in Zygotes: Preferential Transmission of Mitochondrial DNA to the Medial Bud. **142**, 613–623 (1998).
